1 **TITLE**

2 **Crystal structure of schizorhodopsin reveals mechanism of**  
3 **inward proton pumping**

4 Akimitsu Higuchi<sup>1\*</sup>, Wataru Shihoya<sup>1\* ‡</sup>, Masae Konno<sup>2,3</sup>, Tatsuya Ikuta<sup>1</sup>, Hideki  
5 Kandori<sup>4,5</sup>, Keiichi Inoue<sup>2 ‡</sup>, Osamu Nureki<sup>1 ‡</sup>.

6

7

8

9

10

11

12

13

14

15

16

17

18 **Affiliations:**

19 <sup>1</sup> Department of Biological Sciences, Graduate School of Science, The University of  
20 Tokyo, Bunkyo, Tokyo 113-0033, Japan. <sup>2</sup>The Institute for Solid State Physics, The  
21 University of Tokyo, Kashiwa 277-8581, Japan. <sup>3</sup>PRESTO, Japan Science and  
22 Technology Agency, 4-1-8 Honcho, Kawaguchi, Saitama 332-0012, Japan. <sup>4</sup>Department  
23 of Life Science and Applied Chemistry, Nagoya Institute of Technology, Showa, Nagoya  
24 466-8555, Japan. <sup>5</sup>OptoBioTechnology Research Center, Nagoya Institute of Technology,  
25 Showa, Nagoya 466-8555, Japan.

26

27 \*Co-first author

28 ‡To whom correspondence should be addressed. E-mail:, [wtrshh9@gmail.com](mailto:wtrshh9@gmail.com) (W.S.),

29 [inoue@issp.u-tokyo.ac.jp](mailto:inoue@issp.u-tokyo.ac.jp) (K.I.); [nureki@bs.s.u-tokyo.ac.jp](mailto:nureki@bs.s.u-tokyo.ac.jp) (O.N.).

## 30 **Abstract**

31 Schizorhodopsins (SzRs), a new rhodopsin family identified in Asgard archaea,  
32 are phylogenetically located at an intermediate position between type-1 microbial  
33 rhodopsins and heliorhodopsins. SzRs reportedly work as light-driven inward H<sup>+</sup> pumps,  
34 as xenorhodopsin. Here we report the crystal structure of SzR AM\_5\_00977 at 2.1 Å  
35 resolution. The SzR structure superimposes well on that of bacteriorhodopsin rather than  
36 heliorhodopsin, suggesting that SzRs are classified with type-1 rhodopsins. The structure-  
37 based mutagenesis study demonstrated that the residues N100 and V103 are essential for  
38 color tuning in SzRs. The cytoplasmic parts of transmembrane helices 2, 6, and 7 in SzR  
39 are shorter than those in the other microbial rhodopsins. Thus, E81 is located near the  
40 cytosol, playing a critical role in the inward H<sup>+</sup> release. We suggested the H<sup>+</sup> is not  
41 metastably trapped in E81 and released through the water-mediated transport network  
42 from the retinal Schiff base to the cytosol. Moreover, most residues on the H<sup>+</sup> transport  
43 pathway are not conserved between SzRs and xenorhodopsins, suggesting that they have  
44 entirely different inward H<sup>+</sup> release mechanisms.

45

## 46 **Main text**

### 47 **Introduction**

48 Microbial rhodopsins are a large family of heptahelical photoreceptive membrane  
49 proteins that use retinal as a chromophore<sup>1</sup>. They are found in diverse microorganisms,  
50 such as bacteria, archaea, alga, protists, fungi and giant viruses<sup>2-4</sup>. The retinal  
51 chromophore in the microbial rhodopsins undergoes all-*trans* to 13-*cis* isomerization  
52 upon light illumination, leading to a photocyclic reaction in which the proteins exert their  
53 various biological functions. Ion transporting rhodopsins are the most abundant microbial  
54 rhodopsins, and are classified into light-driven ion pumps and light-gated ion channels.  
55 Whereas light-driven ion pumps actively transport ions in one direction, light-gated ion  
56 channels passively transport them according to the electrochemical potential. Ion  
57 transporting rhodopsins are used as important molecular tools in optogenetics, to control

58 neural firing *in vivo*. Microbial rhodopsins evolved independently from animal  
59 rhodopsins, which are also retinal-bound heptahelical proteins and a sub-group of G-  
60 protein coupled receptors. The third class of rhodopsin, heliorhodopsin (HeR), was  
61 recently reported. It has an inverted protein orientation in the membrane, as compared  
62 with microbial and animal rhodopsins<sup>5</sup>.

63 Bacteriorhodopsin (BR) is the first ion pump rhodopsin found in the  
64 haloarchaeon<sup>6</sup>, *Halobacterium salinarum*, and it transports protons (H<sup>+</sup>) outward. An  
65 inward chloride (Cl<sup>-</sup>) pump, halorhodopsin, was subsequently identified in the same  
66 species<sup>7,8</sup>. Although an outward sodium (Na<sup>+</sup>) pump rhodopsin was not found for several  
67 decades after the discovery of BR, it was eventually identified in the marine bacterium  
68 *Krokinobacter eikastus* in 2013<sup>9</sup>. These ion-pumping rhodopsins hyperpolarize the  
69 membrane by their active ion transport against the electrochemical potential of the  
70 membrane. However, the bacterial xenorhodopsins (XeRs) reportedly work as light-  
71 driven inward H<sup>+</sup> pumps<sup>10</sup>. Thus, the membrane potentials are not exclusively  
72 hyperpolarized via active transport by ion pumping.

73 Asgard archaea are the closest prokaryotic species to ancestral eukaryotes<sup>11</sup> and  
74 have many genes unique to eukaryotes. Recently, a new microbial rhodopsin group,  
75 schizorhodopsin (SzR), was found in the assembled genomes of Asgard archaea and the  
76 metagenomic sequences of unknown microbial species<sup>12,13</sup>. A molecular phylogenetic  
77 analysis suggested that SzRs are located at an intermediate position between typical  
78 microbial rhodopsins, also called “type-1 rhodopsins”<sup>14</sup>, and HeR<sup>5</sup>, and thus they were  
79 named “schizo- (meaning “split” in Greek)” rhodopsin. Especially, the transmembrane  
80 helix (TM) 3 of SzR is more similar to that of HeR than type-1, whereas TM6 and 7 of  
81 SzR and type-1 share many identical residues; e.g., W154, P158, T161, A184, and F191,  
82 which are not conserved in HeR<sup>13</sup>. SzRs heterologously expressed in *E. coli* and  
83 mammalian cells displayed light-driven inward H<sup>+</sup> pump activity<sup>13</sup>. As SzRs are  
84 phylogenetically distant from XeRs (~18% identity and ~44% similarity), these two  
85 rhodopsin families with similar functions have convergently evolved.

86 In both SzR and XeR, an H<sup>+</sup> is released from the Schiff base linkage connecting  
87 the retinal and a conserved lysine residue (retinal Schiff-base, RSB) in TM7 to the  
88 cytoplasmic side. The transiently deprotonated RSB shows a largely blue-shifted

89 absorption peak, and this blue-shifted state was named the M-intermediate. In the case of  
90 XeR from the marine bacterium *Parvularcula oceani* (*PoXeR*), the H<sup>+</sup> is transferred to  
91 the cytoplasmic aspartate (*PoXeR* D216, H<sup>+</sup> acceptor) in TM7, and then released to the  
92 cytoplasmic bulk phase<sup>10</sup>. By contrast, the H<sup>+</sup> acceptor of SzR was considered to be E81  
93 in TM3, since the mutation of E81 to glutamine abolished the inward H<sup>+</sup> transport<sup>13</sup>.  
94 However, the H<sup>+</sup> is not metastably trapped in E81, probably for a kinetic reason: the rate  
95 of H<sup>+</sup> release from E81 to the cytoplasmic bulk phase might be faster than that of H<sup>+</sup>  
96 transfer from RSB to E81. The reason why SzR and *PoXeR* exhibit different kinetic  
97 behaviors in H<sup>+</sup> release has not been elucidated. Subsequently, another H<sup>+</sup> is taken up  
98 from the extracellular side, and directly transferred from the extracellular bulk phase to  
99 the RSB during the M-decay to the initial state.

100 Recently, a new SzR sub-group, AntR, was identified in metagenomic data  
101 obtained from Antarctic freshwater lake samples<sup>15</sup>. Although SzR and AntR share  
102 substantial similarity (identity: ~33%; similarity: ~56%) and most of the SzR residues  
103 essential for the inward H<sup>+</sup> pump function are conserved in AntR (e.g., SzR R67, F70,  
104 C75, E81, D184, and K188), they have several differences. Notably, while the SzR E81Q  
105 mutant cannot transport H<sup>+</sup>, as mentioned above, the H<sup>+</sup> transport efficiency of AntR  
106 E81Q is close to that of AntR wild-type (WT)<sup>15</sup>, suggesting the diversity of H<sup>+</sup> transport  
107 mechanisms. To understand the inward H<sup>+</sup> pump mechanism of SzR, as well as the  
108 similarities and differences between SzR, XeR, and AntR, we present the first 3D-  
109 structure of an SzR.

110

## 111 **Functional characterization of SzR4**

112 For the structural analysis, we screened multiple SzRs and identified SzR  
113 AM\_5\_00977 (GenBank accession number: TFG21677.1, hereafter called SzR4) as a  
114 promising candidate (Fig. 1a). We purified and crystallized the full-length SzR4, using *in*  
115 *meso* crystallization. Eventually, we determined the 2.1 Å resolution structure of SzR4,  
116 by molecular replacement using BR as the search model (Table 1).

117 We first characterized the biochemical properties of SzR4. The phylogenetic tree  
118 of microbial rhodopsins indicated that SzR4 belongs to the SzR family, which is far from

119 xenorhodopsin (XeR), and it is close to the previously characterized SzR1 (Fig. 1a). To  
120 investigate the ion transport function of SzR4, we exposed SzR4-expressing *Escherichia*  
121 *coli* to visible light and observed alkalization of the external solvent (Fig. 1b). The  
122 alkalization was largely eliminated by the addition of a protonophore, 10  $\mu$ M CCCP  
123 (carbonyl cyanide m-chlorophenylhydrazone), suggesting that SzR4 functions as an  
124 inward  $H^+$  pump as reported previously<sup>13</sup>. The purified SzR4 showed a maximum  
125 absorption wavelength ( $\lambda_{max}$ ) at 557 nm, identical to that of SzR1<sup>13</sup> (Fig. 1c). The  
126 absorption peak in the visible wavelength region was decreased at higher pH, and another  
127 peak appeared in the UV region ( $\lambda_{max} = 388$  nm) (Fig. 1d, e). The latter represents the  
128 deprotonation of the RSB<sup>13</sup>, and its pKa was  $12.5 \pm 0.2$  (mean  $\pm$  s.d.). This is 1 unit smaller  
129 than that of SzR1, suggesting that the protonated RSB is less stabilized in SzR4.

130 To investigate the photocycle of SzR4, we performed a laser flash photolysis  
131 experiment with SzR4 in POPE/POPG vesicles. Transient absorptions representing the  
132 accumulations of K, L, and M intermediates were observed, as in the photocycle of SzR1  
133<sup>13</sup>(Fig. 1f, g). The sum of five-exponential functions effectively reproduced the time  
134 evolution of the transient absorption change of SzR4. The absorption spectra of the initial  
135 state and four photo-intermediates (K/L<sub>1</sub>, L<sub>2</sub>/M<sub>1</sub>, L<sub>3</sub>/M<sub>2</sub>, and M<sub>3</sub>) and the photocycle of  
136 SzR4 were determined (Fig. 1h, i). The overall photoreaction cycle of SzR4 is similar to  
137 that of SzR1<sup>13</sup>. A large accumulation of the M intermediate was observed in the  
138 millisecond region, representing the deprotonated state of the RSB. An equilibrium exists  
139 between M<sub>1</sub> and M<sub>2</sub> with L at different equilibrium constants, and it is more biased  
140 towards the M for L<sub>3</sub>/M<sub>2</sub> than for L<sub>2</sub>/M<sub>1</sub>. Notably, the absolute spectra of the three M  
141 states were substantially different. Specifically, the vibrational structure observed in M<sub>2</sub>  
142 was less pronounced in M<sub>1</sub> and M<sub>3</sub> (Fig. 1h). This spectral change would originate from  
143 a large conformational change of the protein around the retinal chromophore, and be  
144 associated with the conversion from the inward opened to outward opened state. The  $H^+$   
145 release to the cytoplasmic side is finished until the M<sub>3</sub> formation, and thus a new  $H^+$  is  
146 taken up from the extracellular side during the M<sub>3</sub>-decay<sup>13</sup>. A similar spectral change in  
147 the vibrational structures between two M states was also reported for XeR from  
148 *Nanosalina* (*NsXeR*)<sup>16</sup>, suggesting that a comparable conformational change also occurs  
149 between the  $H^+$  release and uptake processes in SzR and XeR.

## 150 Overall structure of SzR4

151 The crystallographic asymmetric unit contains three molecules (mol A, mol B,  
152 and mol C) (Extended Data Fig. 1a, b). The overall architectures of these three molecules  
153 are almost identical, and thus we focused on the mol A structure. SzR4 consists of 7 TMs  
154 and six loops (extracellular loops 1-3 and intracellular loops 1-3) (Fig. 2a, b). Five  
155 residues after H199 are disordered in the crystal structure. Extracellular loop 2 (residues  
156 G51-Y64) contains a short anti-parallel  $\beta$  strand. All-*trans* retinal is covalently bound to  
157 K188, forming the RSB, as in other microbial rhodopsins.

158 A previous immunostaining analysis revealed that the C terminus of SzR1 is  
159 oriented toward the cytoplasmic side<sup>13</sup>, as in the type-1 rhodopsins, which is opposite to  
160 the HeRs. Many positively and negatively charged residues are present on the  
161 cytoplasmic and extracellular faces, respectively, in the SzR4 structure (Fig. 2c). This  
162 electrostatic surface is consistent with the positive-inside rule<sup>17</sup>, and also supports its  
163 topology.

164 The three SzR4 molecules in the asymmetric unit form a trimer in the crystal  
165 structure, in excellent agreement with the previous HS-AFM observation. TM1 and TM2  
166 of one protomer interact with TM4' and TM5' of the adjacent protomer, creating the trimer  
167 interface (Fig. 3a and Extended Data Fig. 1c). The interface comprises mainly  
168 hydrophobic residues (Extended Data Fig. 1d, e), and several hydrogen-bonding  
169 interactions are observed on the cytoplasmic side. The residues at the interface are  
170 conserved among SzRs (Extended Data Fig. 1f), indicating that SzRs generally function  
171 as trimers.

172 To determine whether SzRs are classified as either type-1 rhodopsins or HeRs, we  
173 compared the structures of SzR4, BR, and *TaHeR*. SzR4 and BR similarly form trimers,  
174 while *TaHeR* forms a dimer (Fig. 3a-c). The SzR4 and BR structures also have the same  
175 configuration of TMs forming trimeric binding interfaces, with TM1 and TM2 of one  
176 monomer creating a binding interface with TM4 and TM5 of the adjacent monomer. SzR4  
177 and BR also share a common orientation relative to the membrane. Moreover, the  
178 monomer structure of SzR4 superimposes well on that of BR (R.M.S.D. = 1.23 Å) (Fig.  
179 3d, e). By contrast, the orientations of SzR4 and *TaHeR* are reversed in the membrane.

180 When the N- and C-termini of SzR4 and *TaHeR* are aligned and their monomeric  
181 structures are superimposed, the slope and length of each TM do not overlap well, as  
182 compared to BR (R.M.S.D. = 2.27 Å) (Fig. 3f, g). Overall, although SzR4 has  
183 approximately 20% sequence identity to both BR and HeR, it is structurally more similar  
184 to BR. Hence, we suggest that SzRs belong to the type-1 rhodopsins.

185 We next compared the SzR4 and BR structures in detail. Each TM overlaps  
186 relatively well, and their ECL2 similarly contain an anti-parallel  $\beta$ -strand (Fig. 3d).  
187 However, there is a striking difference on the cytoplasmic side. The C-terminus of BR  
188 contains a short  $\alpha$ -helix and is directed toward the center of the protein, while the C-  
189 terminus of SzR4 is disordered. Moreover, TM2 and TM6 of SzR4 are shorter than those  
190 of BR by one and two  $\alpha$ -helical turns, respectively. Notably, the length between the  
191 conserved Pro and the cytoplasmic end of TM6 is 13 residues in SzR4, while those in  
192 other type-1 rhodopsins are about 21 residues. Thus, the cytoplasmic part of TM6 in SzR4  
193 is the shortest among the microbial rhodopsins (Extended Data Fig. 3a, b). The sequence  
194 alignment of SzRs revealed that the shorter length of TM6 is highly conserved (Extended  
195 Data Fig. 2), and thus it is a unique structural feature of SzRs.

196

## 197 **Retinal binding site and color tuning mechanism**

198 We next describe the retinal binding pocket in SzR4 (Fig. 4a). D184 forms a direct  
199 salt bridge with the RSB and functions as a single counterion, stabilizing the high pKa  
200 (12.5, Fig. 1e) of the RSB. The other residues in the retinal binding pocket are mainly  
201 hydrophobic. Notably, the aromatic residues Y71 and W154 closely contact the C10-C13  
202 moiety of the retinal from below and above, respectively, allowing the all-*trans* to 13-*cis*  
203 isomerization<sup>13</sup>. These residues are completely conserved in 85 SzR homologs (Fig. 4b).  
204 The equivalent residues are two tryptophan residues in type-1 rhodopsins, and tyrosine  
205 and phenylalanine residues in HeRs. From this viewpoint, SzR is in between BR and HeR.  
206 Among the residues constituting the retinal binding pocket, 7 and 3 residues of SzR4 are  
207 conserved in BR and *TaHeR*, respectively. Thus, the retinal binding pocket of SzR is  
208 similar to that of type-1 rhodopsins, rather than HeRs,

209 The environment around the retinal chromophore is closely associated with the

210 absorption wavelength of rhodopsins. The purified SzR4 displayed the  $\lambda_{\max}$  at 557 nm,  
211 which is identical to that of SzR1, and 555 nm when expressed in *E. coli* cells. Notably,  
212 SzR2 and SzR3 showed blue-shifted absorptions at 542 and 540 nm, respectively (Table  
213 2 and Extended Data Fig. 4). To investigate the color tuning mechanism in SzRs, we  
214 compared the residues constituting the retinal binding pocket between the six homologs  
215 of SzRs (Fig. 4b). These residues are entirely conserved in SzR4, SzR1, SzR  
216 TE\_5S\_00009, and SzR TE\_8s\_00242. Comparing SzR4, SzR2, and SzR3, the residues  
217 around the polyene chain are entirely conserved, whereas those around the  $\beta$ -ionone ring  
218 are more diverged. V103, F122, S125, and W161 in SzR4 are replaced in SzR2, and V103  
219 is replaced in SzR3. Moreover, in the vicinity of the  $\beta$ -ionone ring, N100 in SzR4 is  
220 replaced with M and T in SzR2 and SzR3, respectively. In BR, D115 is present at the  
221 homologous position. BR D115N and D115A showed 2- and 11-nm blue-shifts as  
222 compared with the WT, respectively<sup>18,19</sup>, and thus a different amino acid at this position  
223 would generate distinct  $\lambda_{\max}$  values among SzR4, SzR2, and SzR3.

224 To determine the residues responsible for the color tuning, we comprehensively  
225 swapped the residues around the  $\beta$ -ionone ring between SzR4-SzR2 and SzR4-SzR3 and  
226 measured the  $\lambda_{\max}$  values of the swapped mutants (Table 2 and Extended Data Fig. 4). The  
227 mutants of SzR4 to SzR2-type (SzR4 N100M) and SzR3-type (SzR4 N100T) showed 11-  
228 and 3-nm blue-shifts, respectively. By contrast, 1- and 3-nm red-shifted absorptions were  
229 observed for SzR2 M101N and SzR3 T103N. These results suggest that the difference in  
230 the amino acid at the SzR4 N100 position is one of the color tuning factors, as in type-1  
231 rhodopsins. Moreover, the mutation of SzR4 V103 to the SzR2-type residue (I) induced  
232 a 4-nm blue shift, while the  $\lambda_{\max}$  of SzR2 I104V was 3-nm longer as compared to SzR2  
233 WT. Hence, V103 near the  $\beta$ -ionone ring in SzR2 also contributes to the absorption  
234 difference from SzR4. A methionine is present at this position in BR (M118) and most  
235 type-1 rhodopsins. The mutation of this residue to a smaller amino acid allows the rotation  
236 of the C6-C7 bond of retinal, connecting the  $\beta$ -ionone and polyene chain, and causes blue-  
237 shifted  $\lambda_{\max}$  values in channelrhodopsin (C1C2) and archaerhodopsin-3<sup>20</sup>. This result  
238 suggests that the replacement of the smaller valine with the larger isoleucine at this  
239 position in SzRs would generate blue-shifted  $\lambda_{\max}$  values, as in type-1 rhodopsins.

240 Overall, the structure-based mutagenesis study demonstrated that the amino-acid



241 differences in N100 and V103 are essential factors for color tuning in SzRs. N100 and  
242 V103 are conserved in 61% and 82% of the 85 SzR homologs (Fig. 4b), and are less  
243 conserved as compared to the other residues in the retinal binding site. Thus, these  
244 differences create the diversity of the absorption spectra in SzRs.

245 SzR4 P158 in TM5 and T187 in TM7 are highly conserved in 96% and 100% of  
246 the SzRs (Fig. 4b), and the homologous residues in type-1 rhodopsins play a color tuning  
247 role<sup>21,22</sup>. Mutating the former to threonine or the latter to alanine makes  $\lambda_{\max}$  longer for  
248 many type-1 rhodopsins. To determine whether these color tuning rules also apply in  
249 SzR4, we constructed the SzR4 P158T and T184A mutants. SzR4 P158T showed a 2-nm  
250 shorter  $\lambda_{\max}$  than that of SzR4 WT (Table 2 and Extended Data Fig. 4), suggesting that the  
251 color tuning rule at this position is different between SzR and type-1 rhodopsins. By  
252 contrast, SzR4 T184A displayed a 7-nm red-shifted  $\lambda_{\max}$  as compared to that of SzR4 WT.  
253 A similar red-shift by the mutation of an –OH bearing residue at the same position was  
254 reported in several type-1 rhodopsins<sup>21,22</sup>, and SzR4 T184 has a similar effect on the  
255 excitation energy of the retinal  $\pi$ -electron.

256

### 257 **Insight into proton transport**

258 To investigate the mechanism of inward proton transport, we compared the SzR4  
259 and BR structures. In the outward  $H^+$  pumping BR, an  $H^+$  is transferred from RSB to the  
260 proton acceptor D85 in the early stage of the photocycle at  $\sim 10^{-5}$  sec, and this  $H^+$  is finally  
261 released to the extracellular milieu via a proton release group, consisting of E194, E204  
262 and a hydrated water between them<sup>23</sup> (Fig. 5a and Extended Data Fig. 3c). However, in  
263 SzR4, D85 is replaced with the hydrophobic residue F70. The F70 side chain is directed  
264 toward the membrane environment and not involved in the interaction with the RSB (Fig.  
265 5b and Extended Data Fig. 3d). Moreover, the extracellular  $H^+$  acceptors E194 and E204  
266 in BR are replaced with A168 and T176 in SzR4, respectively. There is no other specific  
267 extracellular  $H^+$  acceptor in SzR4. The SzR4 counterion D184 forms salt bridges with the  
268 RSB and R67, maintaining the low pKa of D184 and preventing its protonation. The  
269 hydrogen bond between Y71 and D184 may block the RSB in SzR4 from interacting with  
270 D184. These structural observations prove that SzR cannot work as an outward proton

271 pump.

272 In BR, a water molecule (water402) bridges the RSB and the counterions D85 and  
273 D212 via hydrogen bonding interactions (Fig. 5a and Extended Data Fig. 3c). This  
274 strongly hydrogen-bonded water molecule is observed in all outward H<sup>+</sup> pumping  
275 rhodopsins<sup>24</sup> and the xenorhodopsins *PoXeR*<sup>25</sup> and *NsXeR*<sup>16</sup>. Around the RSB-counterion  
276 complex in SzR4, three water molecules are present in the space opened by the flipping  
277 of the F70 side chain (Fig. 5b and Extended Data Fig. 3d). These water molecules form  
278 an extensive water-mediated hydrogen-bonding network with S44, R67, S74, and the  
279 counterion D184. However, the RSB in SzR4 does not form any hydrogen-bonding  
280 interactions with the water molecules. This is in excellent agreement with the previous  
281 Fourier transform infrared (FTIR) analysis of SzR1, which indicated the presence of  
282 several water molecules around the chromophore that are not strongly hydrogen-bonded<sup>13</sup>.  
283 Thus, the absence of the strongly hydrogen-bonded water is a unique structural feature of  
284 SzR4, and might be associated with its function.

285 On the cytoplasmic side, E81 forms hydrogen bonds with N34 and T195,  
286 stabilizing its low pKa and negative charge (Fig. 5b). In BR, the equivalent residue D96  
287 works as a cytoplasmic proton donor, supplying an H<sup>+</sup> to the deprotonated RSB in the M  
288 intermediate during the outward H<sup>+</sup> pump cycle<sup>1</sup> (Fig. 5a). In SzRs, E81 plays a critical  
289 role in the H<sup>+</sup> release process upon M-formation during the inward H<sup>+</sup> pump cycle. The  
290 E81Q mutant of SzR4 lost the H<sup>+</sup> transport activity, whereas the E81D mutant retained it  
291 (Extended Data Fig. 5a, b), suggesting that the negative charge of E81 plays an essential  
292 role in the H<sup>+</sup> transport activity, as in SzR1.

293 However, a previous FTIR analysis indicated that the H<sup>+</sup> is not metastably trapped  
294 by E81 in the L/M intermediate of SzR1, unlike *PoXeR*<sup>10</sup>. Instead, it is directly released  
295 into the cytoplasmic milieu in SzR and does not interact with the protein in the L/M state<sup>13</sup>.  
296 In SzR4, E81 is closer to the cytosol, since the cytoplasmic parts of TMs 2, 6, and 7 are  
297 shorter than those in the other type-1 rhodopsins, as described above (Fig. 5b and  
298 Extended Data Fig. 3a, b). E81 is separated from the solvent by only two leucine residues,  
299 L30 and L85, and easily exposed to the solvent by the light-induced structural change.  
300 An H<sup>+</sup> would be attracted to the negative charge of E81 and released to the cytoplasm  
301 through the solvent water molecules.

302           What light-induced structural changes enable the inward H<sup>+</sup> release? Recent time-  
303 resolved study of BR with millisecond time resolution (TR-SMX) has shown that the  
304 rotation of L93 opens the hydrophobic barrier between the RSB and D96 (Fig. 5a),  
305 creating space for the three water molecules that connect them<sup>26</sup>. This structural change  
306 allows the H<sup>+</sup> transfer to the RSB. In SzR4, the equivalent residue L78 also forms the  
307 hydrophobic barrier between the RSB and E81 (Fig. 5b). Three hydrating waters exist  
308 around L78, as in BR. Thus, a similar rotation of L78 would create a water-mediated  
309 transport network from the RSB to the cytosol, with the H<sup>+</sup> released to the cytoplasm  
310 through the network.

311           To investigate the importance of L78 for inward proton transport, we constructed  
312 the L78A mutant. No pH change was observed upon light illumination of *E. coli* cells  
313 expressing SzR4 L78A (Extended Data Fig. 5a, b), suggesting that L78 plays a critical  
314 role in the inward H<sup>+</sup> transport function. Furthermore, the RSB in SzR4 WT was not  
315 hydrolyzed by hydroxylamine (HA) in the dark (Fig. 5c), whereas that in SzR4 L78A was  
316 breached by HA even without light exposure (Fig. 5d). In this mutant, the RSB would be  
317 more accessible to external solvents on the cytoplasmic side and small hydrophilic  
318 molecules such as HA. This result supports the solvent access to E81 during the  
319 photocycle and the untrapped inward H<sup>+</sup> release by SzR4.

320

### 321 **Working model of inward proton release**

322           We mutated the residues on a putative proton transport pathway in SzR4, and all  
323 of the mutations reduced the H<sup>+</sup> transport activity (Extended Data Fig. 5a, b). The mutants  
324 of the residues in TMs 2, 4, 6, and 7 retained the transport activity itself, except for the  
325 counterion mutant (D184N), whereas those in TM3 completely lost it (S74A, C75A,  
326 C75S, C75T, L78A, and E81A). These results suggest the functional importance of TM3,  
327 in that the light-induced structural change of TM3 enables the inward proton transport.

328           Integrating these findings, we propose a structure-based working model of inward  
329 H<sup>+</sup> release (Fig. 6). In M-rise, the protein moieties, including TM3, undergo structural  
330 changes, disrupting the hydrogen-bonding network around E81 and the two hydrophobic  
331 barriers above and below E81. Thus, a water-mediated transport network is formed

332 between the RSB to the cytosol. Then, the RSB is deprotonated, and the H<sup>+</sup> is released to  
333 the solvent through the network, attracted by the negative charge of E81. We refer to this  
334 mechanism as untrapped inward H<sup>+</sup> release.

335 To inwardly uptake an H<sup>+</sup>, the deprotonated RSB should be re-protonated from  
336 the extracellular milieu. In *PoXeR*, the branched thermal isomerization of retinal from  
337 the 13-*cis*-15-*anti* to all-*trans*-15-*anti* and 13-*cis*-15-*syn* configurations is the rate limiting  
338 process for the reprotonation of RSB during the M-decay<sup>10</sup>. The 13-*cis*-15-*anti* to all-  
339 *trans*-15-*anti* isomerization changes the inward-directed orientation of the lone pair on  
340 the nitrogen atom of RSB toward the outward-directed one, and the H<sup>+</sup> can access the  
341 RSB from the extracellular side. An extensive hydrogen-bonding network, including  
342 seven hydrating water molecules, exists between the RSB and the extracellular side (Fig.  
343 6a). Since there is no specific extracellular H<sup>+</sup> donor, as suggested by the comprehensive  
344 mutations of SzR1<sup>13</sup>, the H<sup>+</sup> is directly taken up from the extracellular milieu  
345 simultaneously with the thermal isomerization of the retinal chromophore in the M decay,  
346 through this hydrogen-bonding network as in *PoXeR*<sup>27</sup>.

347

#### 348 **Comparison of SzR4 and NsXeR**

349 SzRs and XeR similarly function as inward proton pumps<sup>13,16</sup>, despite their distant  
350 sequence similarity. To explore their common structural features as inward proton pumps,  
351 we compared the SzR4 and NsXeR structures. As described above, SzR4 has the shortest  
352 TM6, and it enables the “untrapped” inward proton release. However, TMs 2, 5, and 6 of  
353 NsXeR are longer than those of SzR4 by over two turns (Fig. 6a, b and Extended Data  
354 Fig. 6a, b). Unlike SzR4, the N-terminus and ICL1 in NsXeR contain characteristic  $\alpha$ -  
355 helices. SzR4 superimposes well on BR (R.M.S.D. =1.22 Å), rather than NsXeR  
356 (R.M.S.D. =1.51 Å). At the secondary structure level, SzR4 and NsXeR do not share  
357 common structural features as inward proton pumps.

358 We also compared the proton transport pathways in SzR4 and NsXeR (Fig. 6a, b).  
359 F70 and D184 in SzR4 are replaced with D76 and P209 in NsXeR, respectively. Thus,  
360 SzR4 and NsXeR similarly have a single counterion, although its relative position in the  
361 structure is different. The smaller negative charge on the extracellular side of the RSB, as

362 compared to the outward  $H^+$  pumps with double counterions, would increase the  
363 directionality of  $H^+$  transfer to the cytoplasmic  $H^+$  acceptor relative to the extracellular  
364 counterion. *NsXeR* has the proton acceptors H48 and D220 on the cytoplasmic side, and  
365 the  $H^+$  is trapped by these residues in the M state. However, these residues are not  
366 conserved in SzR4, and the  $H^+$  is not trapped in the M state. Moreover, the other residues  
367 on the proton transport pathway are not conserved between SzR4 and *NsXeR*, suggesting  
368 that they have entirely different inward  $H^+$  release mechanisms. Nevertheless, SzR4 and  
369 *NsXeR* similarly have the extensive water-mediated hydrogen-bonding network in their  
370 extracellular halves, and the  $H^+$  is easy to access from the extracellular milieu to the RSB.  
371

## 372 **Discussion**

373 Our SzR4 structure offers numerous insights into the structure-function  
374 relationships and color tuning mechanisms of the SzR family members. Although SzRs  
375 are phylogenetically located at an intermediate position between type-1 rhodopsins and  
376 HeRs, SzRs are structurally similar to type-1 rhodopsins, and thus we classified SzRs  
377 with them. Since the cytoplasmic part of TM6 is the shortest among the microbial  
378 rhodopsins, E81 is located near the cytosol and plays a critical role in the inward proton  
379 transport. Given that the  $H^+$  is not trapped in E81, light-induced structural changes would  
380 displace the rotamer of L78, releasing the  $H^+$  to the solvent water molecules, attracted by  
381 the negative charge of E81 (Fig. 6).

382 By contrast, in AntR, the proton transport rate of E81Q is reportedly similar to  
383 that of the WT<sup>15</sup>, indicating that the negative charge of E81 is not essential for its function.  
384 To understand the proton uptake mechanism of AntR, we constructed a homology model  
385 of AntR based on the SzR4 structure (Extended Data Fig. 7a, b). In this model, similar to  
386 D96 in BR, E81 does not form any polar interactions and is surrounded by hydrophobic  
387 residues. Thus, E81 would be protonated and not associated with the proton transport in  
388 AntR. Notably, D30 forms a hydrogen-bonding network with R84 and Y193, which are  
389 located somewhat closer to the cytoplasmic side as compared with E81. These residues  
390 are unique in AntR (Extended Data Fig. 7a). A previous study demonstrated that the R84A  
391 mutant retains the proton transport activity, whereas M-formation is absent in the

392 photocycle of the Y193F mutant. These observations suggest that the hydrogen-bonding  
393 interaction between D30 and Y193 is critical in the photoactivation of AntR. Instead of  
394 E81, D30 might be deprotonated and negatively charged, and thus play an essential role  
395 in the inward proton release by AntR. The homology model of AntR represents the  
396 diversity of the inward proton transport mechanisms among the SzR/AntR family  
397 members.

398

## 399 **Acknowledgements**

400 The diffraction experiments were performed at SPring-8 BL32XU (proposals  
401 2018B2544 and 2019A0153). We thank the members of the Nureki lab and the beamline  
402 staff at BL32XU of SPring-8 (Sayo, Japan) for technical assistance during data collection;  
403 Drs. O. Béjà, R. Ghai, S. P. Tsunoda and S. Hososhima for useful discussions; and R.  
404 Nakamura and Y. Yamauchi for technical assistance. This research was partially supported  
405 by the Platform Project for Supporting Drug Discovery and Life Science Research (Basis  
406 for Supporting Innovative Drug Discovery and Life Science Research (BINDS)) from  
407 AMED under grant number JP19am0101070 (support number 1627). This work was  
408 supported by JSPS KAKENHI grants 16H06294 (O.N.), 20H05437, 20K15728 (W.S.),  
409 25104009, 15H02391, 18H03986 (H.K.), and 17H03007 (K.I.), and by JST PRESTO  
410 (JPMJPR15P2) and CREST (JPMJCR1753 and JPMJCR17N5).

411

## 412 **Author contributions**

413 A.H. screened the homologs of the SzRs and crystallized SzR4. A.H. and W.S.  
414 solved and refined the structure. M.K. and K.I. performed the functional analyses of SzRs,  
415 with the supervision by H.K. T.I. performed the homology modeling of AntR. The  
416 manuscript was mainly prepared by A.H., W.S., K.I., and O.N. The research was  
417 supervised by W.S., K.I., and O.N. The authors declare no competing financial interests.  
418 Coordinates and structure factors have been deposited in the Protein Data Bank, under  
419 the accession number XXXX. The X-ray diffraction images are also available at SBCGrid  
420 Data Bank (<https://data.sbgrid.org/>), under the ID YYY.

421 **Fig. 1. Characterization of molecular properties of SzR4.**

422 **a**, Phylogenetic tree of microbial rhodopsins. **b**, H<sup>+</sup>-transport activity assay of SzR4 in *E.*  
423 *coli* cells suspended in 100 mM NaCl. Blue and green lines indicate the results in the  
424 absence and presence of CCCP, respectively. **c**, UV-visible absorption spectrum of  
425 purified SzR4. **d, e**, UV-visible absorption spectra (**d**), and absorption of SzR4 at  $\lambda = 556$   
426 (green circles) and 388 nm (blue circles) at pH 8.0-13.5 (**e**) in 100 mM NaCl 6-mix buffer  
427 (citrate, MES, HEPES, MOPS, CHES, CAPS, 10 mM each) containing 0.05% DDM. The  
428 solid lines in the latter indicate lines obtained by global fitting with the Henderson–  
429 Hasselbalch equation, and the pK<sub>a</sub> was determined to be  $12.5 \pm 0.2$  (mean  $\pm$  s.d.). **f, g**,  
430 Transient absorption spectra of SzR4 (**f**) and time-evolutions at specific wavelengths  
431 representing each state (388 nm: the M intermediate; 559 nm: the L intermediate and  
432 SzR4; 634 nm: the K intermediate) (**g**) in 100 mM NaCl, 20 mM Tris-HCl, pH 8.0,  
433 POPE/POPG (molar ratio 3:1) vesicles with a lipid to protein molar ratio = 50. The thin  
434 yellow lines in the latter indicate the lines obtained by global fitting with a multi-  
435 exponential function. **h, i**, Calculated absolute absorption spectra of the initial state and  
436 the photo-intermediates (**h**) and the photocycle (**i**) of SzR4, based on the fitting shown in  
437 **e** and a kinetic model assuming a sequential photocycle. The lifetime ( $\tau$ ) of each  
438 intermediate is indicated by mean  $\pm$  s.d. The numbers in parentheses indicate the fraction  
439 of the M intermediate decayed with each lifetime in its double-exponential decay.

440 **Fig. 2. Overall structure of SzR4.**

441 **a**, Ribbon diagrams viewed from the membrane plane (right). **b**, Schematic representation  
442 of the SzR4 structure. **c**, Electrostatic surface viewed from the membrane plane. Red and  
443 blue correspond to potentials of  $-8 \text{ kT e}^{-1}$  and  $8 \text{ kT e}^{-1}$ , respectively.

444

445 **Fig. 3. Comparison of SzR4, BR, and TaHeR.**

446 **a-c**, Monomer and oligomeric structures of SzR4 (**a**), BR (Protein Data Bank (PDB) code:  
447 1M0L) (**b**), and TaHeR (PDB code: 6IS6) (**c**), colored magenta, yellow, and dark

448 turquoise. **d, e**, Superimpositions of the SzR4 and BR structures. Individual TM helices  
449 are shown after superimposition of the two rhodopsins (**e**). **f, g**, Superimpositions of the  
450 SzR4 and TaHeR structures (**f**). Individual TM helices are shown after superimposition  
451 of the two rhodopsins (**g**).

452

453 **Fig. 4. Conservation of retinal binding site.**

454 **a**, The retinal chromophore and the residues within 4.5 Å involved in retinal binding. **b**,  
455 Maximally conserved residues around retinal and their percentages in SzR family  
456 members, with residue numbering according to SzR4. The variations of the amino acid  
457 types in six SzRs, BR, and TaHeR are shown in the lower part.

458

459 **Fig. 5. Essential residues for inward proton uptake.**

460 **a, b**, Essential residues for proton transfer in SzR4 (**a**) and BR (**b**). Waters are shown as  
461 cyan spheres. **c, d**, The difference absorption spectra between after and before  
462 hydroxylamine bleaching reactions of SzR4 WT (**c**) and SzR4 L78A (**d**) in solubilized *E.*  
463 *coli* membranes. The  $\lambda_{\max}$  of each SzR and mutant was determined by the positions of the  
464 absorption peaks of the original proteins indicated in each panel, and the absorption of  
465 retinal oxime produced by the hydrolysis reaction of RSB and hydroxylamine was  
466 observed as peaks around 360–370 nm. The reaction was first performed in the dark for  
467 10 min and then exposed to light for 64 min. Whereas no detectable bleaching of the  
468 visible region was observed for SzR4 WT in the first 10 min of the reaction in the dark,  
469 ca. 70% protein was bleached for SzR4 L78A during the same time period.

470

471 **Fig. 6. Working model of inward proton release by SzR.**

472 Models of dark and M-intermediate of SzR4. Water molecules are shown as cyan spheres,  
473 Hydrogen-bonding interactions are indicated by black dashed lines.

474



475 **Fig. 7. Ion translocation pathway in inward H<sup>+</sup> pumps.**

476 **a, b**, Putative key residues inside SzR4 (**a**) and *NsXeR* (**b**) are shown. Black arrows show  
477 the proposed proton path.

478

479 **Table 1. Data collection and refinement statistics.**

480

481 **Table 2. Absorption maximum positions of SzR4, SzR2, and SzR3 and their**  
482 **mutants.**

483  $\lambda_{\max}$ : The maximum absorption wavelength

484  $\Delta\lambda_{\max}$ : The difference from the wildtype protein

485  $\lambda_{\max}$  values of SzR4 S125Y, V103T, and T187V could not be determined, due to their low  
486 expression in *E. coli*.

487

488 **Methods**

489 **Expression and purification**

490 The gene encoding SzR4 (GenBank ID: TFG21677.1), with codons optimized  
491 for an *E. coli* expression system, was synthesized (Genscript) and subcloned into the  
492 pET21a(+)-vector with an N-terminal 6×His-tag. The protein was expressed in *E. coli*  
493 C41(Rosetta). Protein expression was induced by 1 mM isopropyl  $\beta$ -D-  
494 thiogalactopyranoside (IPTG) for 20 h at 25 °C, and then the culture was supplemented  
495 with 10  $\mu$ M all-*trans* retinal (Sigma Aldrich). The harvested cells were disrupted by  
496 sonication in buffer, containing 20 mM Tris-HCl (pH 7.5), 20% glycerol. The crude  
497 membrane fraction was collected by ultracentrifugation at 180,000g for 1 h. The  
498 membrane fraction was solubilized for 1 h at 4 °C, in buffer, containing 20 mM Tris-HCl  
499 (pH 7.5), 150 mM NaCl, 1% DDM, and 10% glycerol. The supernatant was separated  
500 from the insoluble material by ultracentrifugation at 180,000g for 20 min, and incubated

501 with TALON resin (Clontech) for 30 min. The resin was washed with ten column volumes  
502 of buffer, containing 20 mM Tris-HCl (pH 7.5), 500 mM NaCl, 0.03% DDM, and 15 mM  
503 imidazole. The protein was eluted in buffer, containing 20 mM Tris-HCl (pH 7.5), 500  
504 mM NaCl, 0.03% DDM, and 200 mM imidazole. The eluate was concentrated and loaded  
505 onto a Superdex200 10/300 Increase size-exclusion column, equilibrated in buffer,  
506 containing 20 mM Tris-HCl (pH 7.5), 150 mM NaCl and 0.03% DDM. Peak fractions  
507 were pooled, concentrated to 30 mg ml<sup>-1</sup> using a centrifugal filter device (Millipore  
508 50 kDa MW cutoff), and frozen until crystallization.

509

## 510 **Crystallization**

511 The protein was reconstituted into monoolein at a weight ratio of 1:1.5 (protein:  
512 lipid). The protein-laden mesophase was dispensed into 96-well glass plates in 30 nL  
513 drops and overlaid with 800 nL precipitant solution, using a Gryphon robot (ARI).  
514 Crystals of SzR4 were grown at 20°C in precipitant conditions containing 20%  
515 PEG500DME, 100 mM Na-acetate, pH 4.75, and 250 mM MgSO<sub>4</sub>. The crystals were  
516 harvested directly from the LCP using micromounts (MiTeGen) or LithoLoops (Protein  
517 Wave) and frozen in liquid nitrogen, without adding any extra cryoprotectant.

518

## 519 **Data collection and structure determination**

520 X-ray diffraction data were collected at the SPring-8 beamline BL32XU with an  
521 EIGER X 9M detector (Dectris), using a wavelength of 1.0 Å. In total, 148 small-wedge  
522 (10° per crystal) datasets were obtained using a 15×10 μm<sup>2</sup> beam. The collected images  
523 were processed with KAMO<sup>28</sup>. Each data set was indexed and integrated with XDS<sup>29</sup> and  
524 then subjected to a hierarchical clustering analysis based on the unit cell parameters, using  
525 BLEND. After outlier rejection, 127 datasets were finally merged with XSCALE<sup>29</sup>. The  
526 SzR4 structure was determined by molecular replacement with PHASER<sup>30</sup>, using the  
527 structure of bacteriorhodopsin (PDB code: 1M0K)<sup>31</sup>. Subsequently, the model was rebuilt  
528 and refined using COOT<sup>32</sup> and phenix.refine<sup>33</sup>. Figures were prepared with CueMol

529 (<http://www.cuemol.org/ja/>).

530

### 531 **Laser flash photolysis**

532 For the laser flash photolysis measurement, SzR4 was purified and reconstituted  
533 into a mixture of POPE (Avanti Polar Lipids, AL) and POPG (sodium salt, Avanti Polar  
534 Lipids, AL) (molar ratio = 3:1), with a protein-to-lipid molar ratio of 1:50, in buffer,  
535 containing 20 mM Tris-HCl (pH 8.0) and 100 mM NaCl. The absorption of the protein  
536 solution was adjusted to 0.8–0.9 (total protein concentration  $\sim 0.25$  mg ml<sup>-1</sup>) at an  
537 excitation wavelength of 532 nm. The sample was illuminated with a beam of the second  
538 harmonics of a nanosecond-pulsed Nd<sup>3+</sup>-YAG laser ( $\lambda = 532$  nm, 3 mJ pulse<sup>-1</sup>, 1 Hz)  
539 (INDI40; Spectra-Physics, CA). The transient absorption spectra were obtained by  
540 monitoring the intensity change of white-light from a Xe-arc lamp (L9289-01,  
541 Hamamatsu Photonics, Japan) passed through the sample, with an ICCD linear array  
542 detector (C8808-01, Hamamatsu, Japan). To increase the signal-to-noise (S/N) ratio, 90  
543 spectra were averaged and a singular-value-decomposition (SVD) analysis was applied.  
544 To measure the time-evolutions of transient absorption changes at specific wavelengths,  
545 the light from the Xe-arc lamp (L9289-01, Hamamatsu Photonics, Japan) was  
546 monochromated with a monochromator (S-10, SOMA OPTICS, Japan), and the change  
547 in the intensity after photo-excitation was monitored with a photomultiplier tube (R10699,  
548 Hamamatsu Photonics, Japan) equipped with a notch filter (532 nm, bandwidth = 17 nm,  
549 Semrock, NY) to remove the scattered pump pulses. To increase the S/N ratio, 100 signals  
550 were averaged.

551

### 552 **Measurement of absorption maximum wavelength by hydroxylamine**

#### 553 **bleaching**

554 The  $\lambda_{\max}$  values of the wildtype and mutants of SzR4, SzR2, and SzR3 were  
555 determined by bleaching the protein with hydroxylamine, according to the previously

556 reported method<sup>22</sup>. *E. coli* cells expressing rhodopsins were washed three times with  
557 buffer, containing 50 mM Na<sub>2</sub>HPO<sub>4</sub> (pH 7) and containing 100 mM NaCl. The washed  
558 cells were treated with 1 mM lysozyme for 1 hr at room temperature, and then disrupted  
559 by sonication. To solubilize the rhodopsins, 3% DDM was added and the samples were  
560 stirred overnight at 4 °C. The rhodopsins were bleached with 500 mM hydroxylamine in  
561 the dark or under yellow light illumination ( $\lambda > 500$  nm) from the output of a 1 kW  
562 tungsten–halogen projector lamp (Master HILUX-HR, Rikagaku) passed through a glass  
563 filter (Y-52, AGC Techno Glass). The absorption change upon bleaching was measured  
564 by a UV-visible spectrometer (V-730, JASCO, Japan) equipped with an integrating sphere  
565 (ISV-922, JASCO, Japan).

566

## 567 **Homology modeling of AntR**

568 The AntR homology model was built based on the crystal structure of SzR using  
569 Modeller<sup>34–37</sup>. The input sequence alignment was generated from the sequence of SzR  
570 (residues 1-199) and AntR.

571

## 572 **Extended Data Figures**

### 573 **Extended Data Fig. 1. Structural analysis of SzR4.**

574 **a, b**, Structural comparisons of molA with molB (**a**) and molC (**b**). **c-e**, Oligomeric  
575 interface of the SzR4 structure. **f**, Conservation of the trimer interface in the SzR4  
576 structure. The sequence conservation among 85 SzRs was calculated using the ConSurf  
577 server (<http://consurf.tau.ac.il>) and colored from cyan (low) to maroon (high).

578

579

### 580 **Extended Data Fig. 2. Structure-based alignment of SzRs.**

581 Multiple amino acid sequential alignments of SzR4 with typical microbial rhodopsins.  
582 The amino acid sequences were aligned using ClustalW<sup>38</sup>. SzR1, SzR2, SzR3, SzR

583 TE\_8\_00242, SzR\_TE\_5S\_00009, SzR\_un\_Tekir\_02407, Bacteriorhodopsin (BR),  
584 *Natronomonas pharaonis* halorhodopsin (*NpHR*), green-absorbing proteorhodopsin  
585 (GPR), *Krokinobacter* rhodopsin 2 (KR2), *Parvularcula oceani* xenorhodopsin (*PoXeR*),  
586 *Chlamydomonas reinhardtii* channelrhodopsin 2 (*CrChR2*), and HeRs (HeR-48C12 and  
587 *Thermoplasma* archaeon SG8-52-1 heliorhodopsin (*TaHeR*)) were aligned with the  
588 sequence of SzR4. The residue numbers of SzR4 and BR are shown on top of the residues,  
589 and the positions of transmembrane helices and  $\beta$ -strands, based on the X-ray  
590 crystallographic structures of SzR4 and BR (PDB ID: 1M0L<sup>31</sup>), are indicated by  
591 rectangles and arrows, respectively. For clarity, the diverse, long N- and C-termini and  
592 interhelical loops of *NpHR*, GPR, KR2, *CrChR2*, *PoXeR*, *TaHeR*, and HeR 48C12 were  
593 omitted

594

595 **Extended Data Fig. 3. Comparison of SzR4 with other microbial**  
596 **rhodopsins.**

597 **a, b**, Superimposition of SzR4 with the proton-pumping rhodopsins (**a**) and the other  
598 microbial rhodopsins (**b**), determined to date. SzR4 and the other rhodopsins are colored  
599 magenta and blue, respectively. **c, d**, Comparison of the water-mediated hydrogen-  
600 bonding networks around the RSBs in BR (**c**) and SR4 (**d**).

601

602 **Extended Data Fig. 4. Determination of  $\lambda_{\max}$  of SzR and mutants.**

603 Difference absorption spectra between after and before hydroxylamine bleaching  
604 reactions of SzR and their mutants in solubilized *E. coli* membranes. The  $\lambda_{\max}$  of each  
605 SzR and mutant was determined by the positions of the absorption peaks of the original  
606 proteins indicated in each panel, and the absorption of retinal oxime produced by the  
607 hydrolysis reaction of RSB and hydroxylamine was observed as peaks around 360–370  
608 nm.

609

610 **Extended Data Fig. 5. Inward proton transport activity of SzR4 mutants.**

611 **a**, pH changes upon light illumination of suspensions of *E. coli* cells expressing SzR4  
612 wildtype and mutants, without (blue lines) and with (green lines) 10  $\mu$ M CCCP. Light  
613 illumination occurred in the time regions indicated by yellow lines. **b**, Proton uptake rates  
614 of SzR4 wildtype and mutants, calculated by dividing the proton concentration change  
615 per second upon light illumination by the protein concentration.

616

617 **Extended Data Fig. 6. Structural comparison of SzR4 and NsXeR.**

618 **a**, Superimposition of the SzR4 and NsXeR structures. **b**, Individual TM helices are  
619 shown after superimposition of the two rhodopsins, as in (**a**).

620

621 **Extended Data Fig. 7. Comparison of SzR4 and AntR.**

622 **a**, Amino acid alignment of SzR4 and AntR. **b**, The homology model of AntR.

623

624 **Reference**

625 1. Ernst, O. P. *et al.* Microbial and animal rhodopsins: structures, functions, and  
626 molecular mechanisms. *Chem. Rev.* **114**, 126–163 (2014).

627 2. Govorunova, E. G., Sineshchekov, O. A., Li, H. & Spudich, J. L. Microbial  
628 Rhodopsins: Diversity, Mechanisms, and Optogenetic Applications. *Annu. Rev.*  
629 *Biochem.* **86**, 845–872 (2017).

630 3. Pinhassi, J., DeLong, E. F., B ej a, O., Gonz alez, J. M. & Pedr os-Ali o, C. Marine

- 631 Bacterial and Archaeal Ion-Pumping Rhodopsins: Genetic Diversity, Physiology, and  
632 Ecology. *Microbiol. Mol. Biol. Rev. MMBR* **80**, 929–954 (2016).
- 633 4. Schulz, F. *et al.* Giant virus diversity and host interactions through global  
634 metagenomics. *Nature* **578**, 432–436 (2020).
- 635 5. Pushkarev, A. *et al.* A distinct abundant group of microbial rhodopsins discovered  
636 using functional metagenomics. *Nature* **558**, 595–599 (2018).
- 637 6. Oesterhelt, D. & Stoeckenius, W. Rhodopsin-like Protein from the Purple Membrane  
638 of Halobacterium halobium. *Nature. New Biol.* **233**, 149–152 (1971).
- 639 7. Matsuno-Yagi, A. & Mukohata, Y. Two possible roles of bacteriorhodopsin; a  
640 comparative study of strains of Halobacterium halobium differing in pigmentation.  
641 *Biochem. Biophys. Res. Commun.* **78**, 237–243 (1977).
- 642 8. Schobert, B. & Lanyi, J. K. Halorhodopsin is a light-driven chloride pump. *J. Biol.*  
643 *Chem.* **257**, 10306–10313 (1982).
- 644 9. Inoue, K. *et al.* A light-driven sodium ion pump in marine bacteria. *Nat. Commun.* **4**,  
645 1678 (2013).
- 646 10. Inoue, K. *et al.* A natural light-driven inward proton pump. *Nat. Commun.* **7**, 13415  
647 (2016).
- 648 11. Imachi, H. *et al.* Isolation of an archaeon at the prokaryote–eukaryote interface.

- 649 *Nature* **577**, 519–525 (2020).
- 650 12. Bulzu, P.-A. *et al.* Casting light on Asgardarchaeota metabolism in a sunlit microoxic  
651 niche. *Nat. Microbiol.* **4**, 1129–1137 (2019).
- 652 13. Inoue, K. *et al.* Schizorhodopsins: A family of rhodopsins from Asgard archaea that  
653 function as light-driven inward H<sup>+</sup> pumps. *Sci. Adv.* **6**, eaaz2441 (2020).
- 654 14. Spudich, J. L. & Jung, K.-H. in Handbook of photosensory receptors. Wiley-VCH  
655 Verlag GmbH & Co. KGaA, 1–23 (2005)
- 656 15. Harris, A. *et al.* Mechanism of Inward Proton Transport in an Antarctic Microbial  
657 Rhodopsin. *J. Phys. Chem. B* **124**, 4851–4872 (2020).
- 658 16. Shevchenko, V. *et al.* Inward H<sup>+</sup> pump xenorhodopsin: Mechanism and alternative  
659 optogenetic approach. *Sci. Adv.* **3**, e1603187 (2017).
- 660 17. Wallin, E. & von Heijne, G. Genome-wide analysis of integral membrane proteins  
661 from eubacterial, archaean, and eukaryotic organisms. *Protein Sci. Publ. Protein Soc.*  
662 **7**, 1029–1038 (1998).
- 663 18. Váró, G. *et al.* A residue substitution near the beta-ionone ring of the retinal affects  
664 the M substates of bacteriorhodopsin. *Biophys. J.* **61**, 820–826 (1992).
- 665 19. Perálvarez-Marín, A., Márquez, M., Bourdelande, J.-L., Querol, E. & Padrós, E. Thr-  
666 90 plays a vital role in the structure and function of bacteriorhodopsin. *J. Biol. Chem.*



- 667           **279**, 16403–16409 (2004).
- 668    20. Kato, H. E. *et al.* Atomistic design of microbial opsin-based blue-shifted optogenetics  
669           tools. *Nat. Commun.* **6**, 7177 (2015).
- 670    21. Shimono, K., Ikeura, Y., Sudo, Y., Iwamoto, M. & Kamo, N. Environment around the  
671           chromophore in pharaonis phoborhodopsin: mutation analysis of the retinal binding  
672           site. *Biochim. Biophys. Acta BBA - Biomembr.* **1515**, 92–100 (2001).
- 673    22. Inoue, K. *et al.* Red-shifting mutation of light-driven sodium-pump rhodopsin. *Nat.*  
674           *Commun.* **10**, 1993 (2019).
- 675    23. Garczarek, F. & Gerwert, K. Functional waters in intraprotein proton transfer  
676           monitored by FTIR difference spectroscopy. *Nature* **439**, 109–112 (2006).
- 677    24. Nomura, Y. *et al.* Low-temperature FTIR spectroscopy provides evidence for protein-  
678           bound water molecules in eubacterial light-driven ion pumps. *Phys. Chem. Chem.*  
679           *Phys. PCCP* **20**, 3165–3171 (2018).
- 680    25. Ito, S., Sugita, S., Inoue, K. & Kandori, H. FTIR Analysis of a Light-driven Inward  
681           Proton-pumping Rhodopsin at 77 K. *Photochem. Photobiol.* **93**, 1381–1387 (2017).
- 682    26. Weinert, T. *et al.* Proton uptake mechanism in bacteriorhodopsin captured by serial  
683           synchrotron crystallography. *Science* **365**, 61–65 (2019).
- 684    27. Inoue, K. *et al.* Spectroscopic Study of Proton-Transfer Mechanism of Inward

- 685 Proton-Pump Rhodopsin, Parvularcula oceani Xenorhodopsin. *J. Phys. Chem. B* **122**,  
686 6453–6461 (2018).
- 687 28. Yamashita, K., Hirata, K. & Yamamoto, M. KAMO: towards automated data  
688 processing for microcrystals. *Acta Crystallogr. Sect. Struct. Biol.* **74**, 441–449 (2018).
- 689 29. Kabsch, W. XDS. *Acta Crystallogr. D Biol. Crystallogr.* **66**, 125–132 (2010).
- 690 30. McCoy, A. J. *et al.* Phaser crystallographic software. *J. Appl. Crystallogr.* **40**, 658–  
691 674 (2007).
- 692 31. Schobert, B., Cupp-Vickery, J., Hornak, V., Smith, S. & Lanyi, J. Crystallographic  
693 structure of the K intermediate of bacteriorhodopsin: conservation of free energy  
694 after photoisomerization of the retinal. *J. Mol. Biol.* **321**, 715–726 (2002).
- 695 32. Emsley, P. & Cowtan, K. Coot: model-building tools for molecular graphics. *Acta*  
696 *Crystallogr. D Biol. Crystallogr.* **60**, 2126–2132 (2004).
- 697 33. Afonine, P. V. *et al.* Towards automated crystallographic structure refinement with  
698 phenix.refine. *Acta Crystallogr. D Biol. Crystallogr.* **68**, 352–367 (2012).
- 699 34. Sali, A. & Blundell, T. L. Comparative protein modelling by satisfaction of spatial  
700 restraints. *J. Mol. Biol.* **234**, 779–815 (1993).
- 701 35. Fiser, A., Do, R. K. & Sali, A. Modeling of loops in protein structures. *Protein Sci.*  
702 *Publ. Protein Soc.* **9**, 1753–1773 (2000).

- 703 36. Martí-Renom, M. A. *et al.* Comparative protein structure modeling of genes and  
704 genomes. *Annu. Rev. Biophys. Biomol. Struct.* **29**, 291–325 (2000).
- 705 37. Webb, B. & Sali, A. Comparative Protein Structure Modeling Using MODELLER.  
706 *Curr. Protoc. Bioinforma.* **54**, 5.6.1-5.6.37 (2016).
- 707 38. Thompson, J. D., Higgins, D. G. & Gibson, T. J. CLUSTAL W: improving the  
708 sensitivity of progressive multiple sequence alignment through sequence weighting,  
709 position-specific gap penalties and weight matrix choice. *Nucleic Acids Res.* **22**,  
710 4673–4680 (1994).
- 711

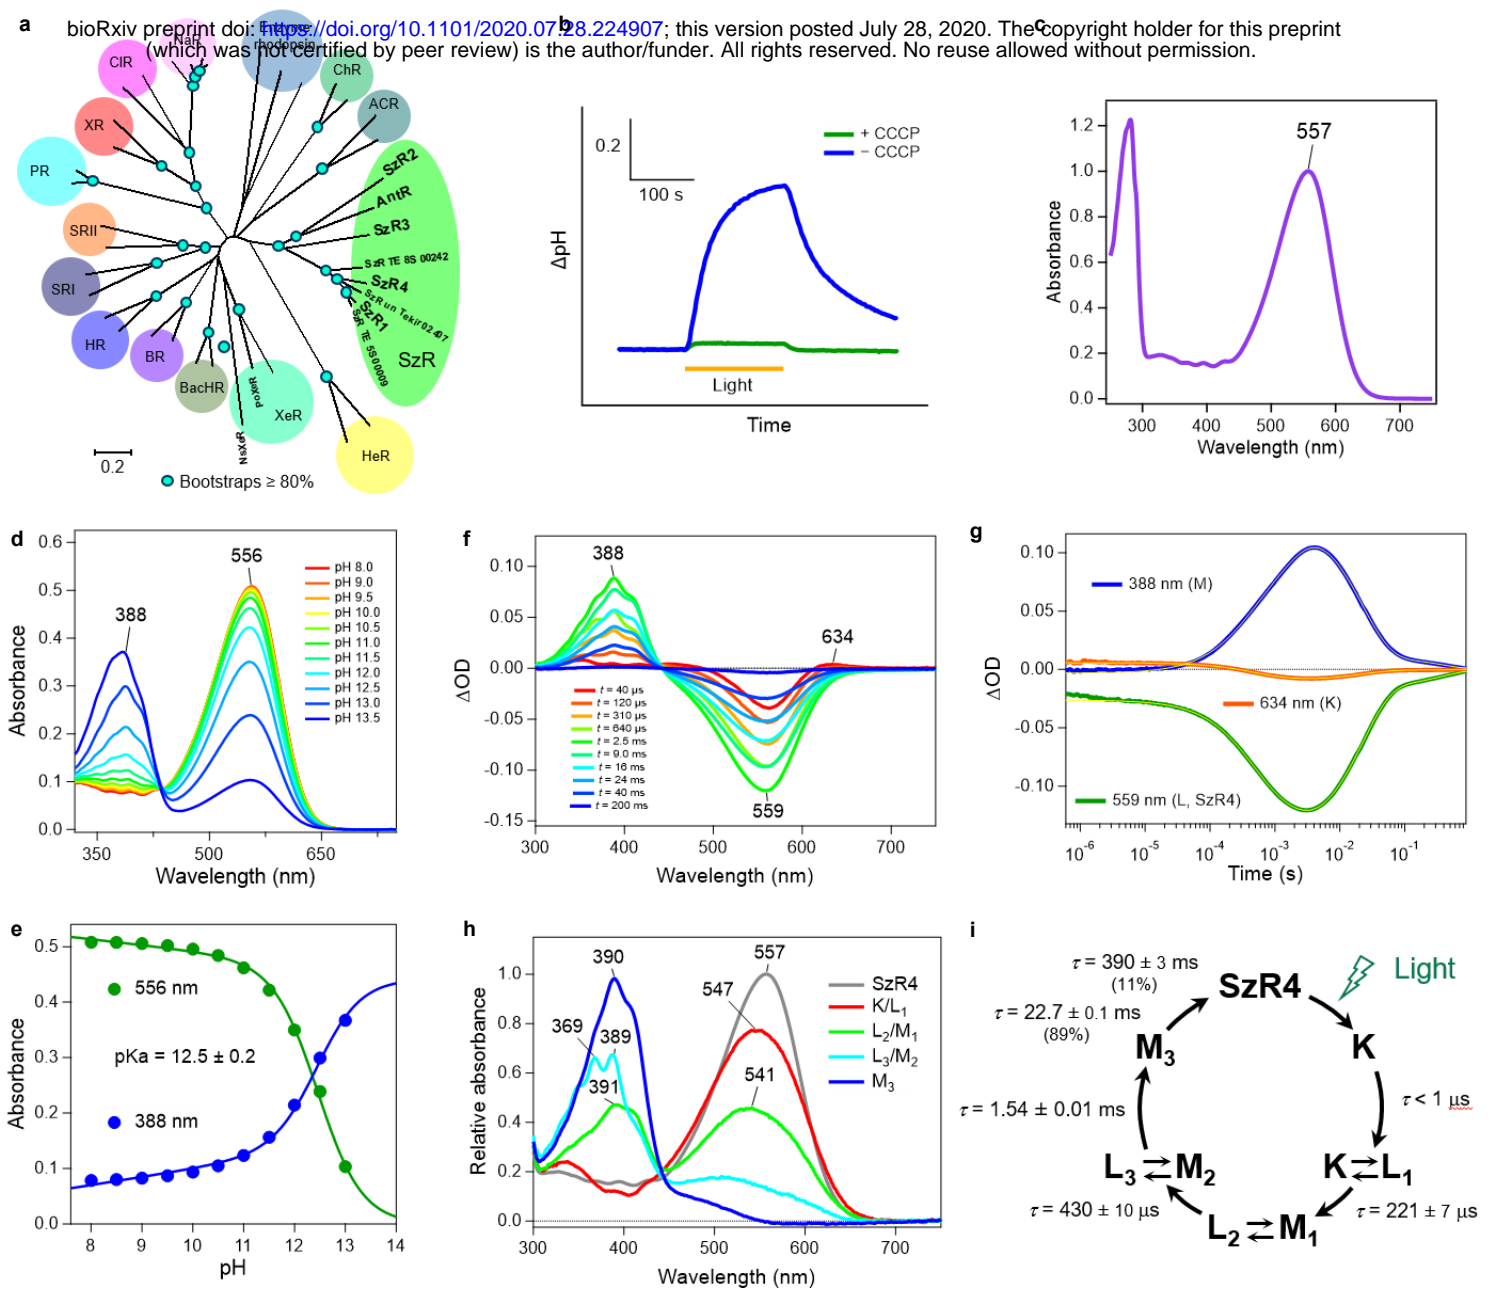

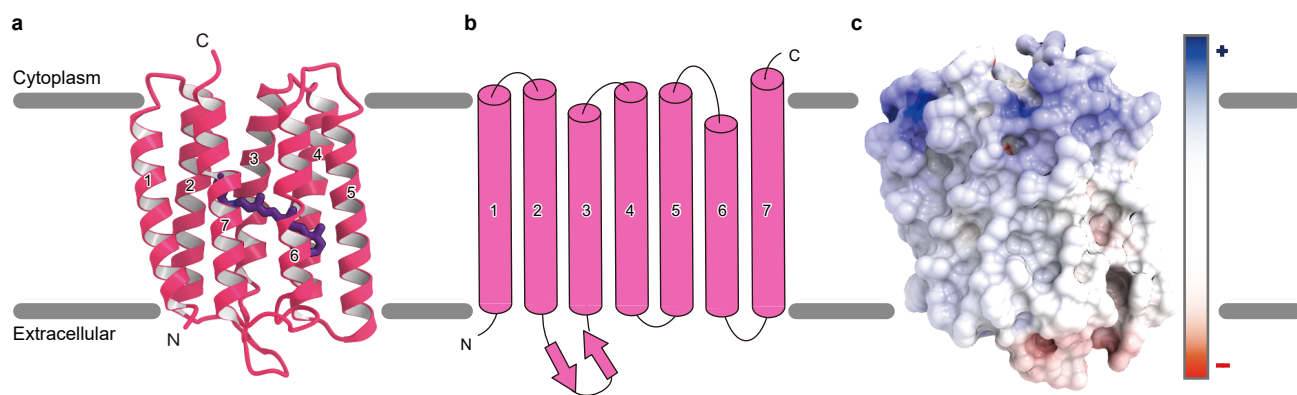

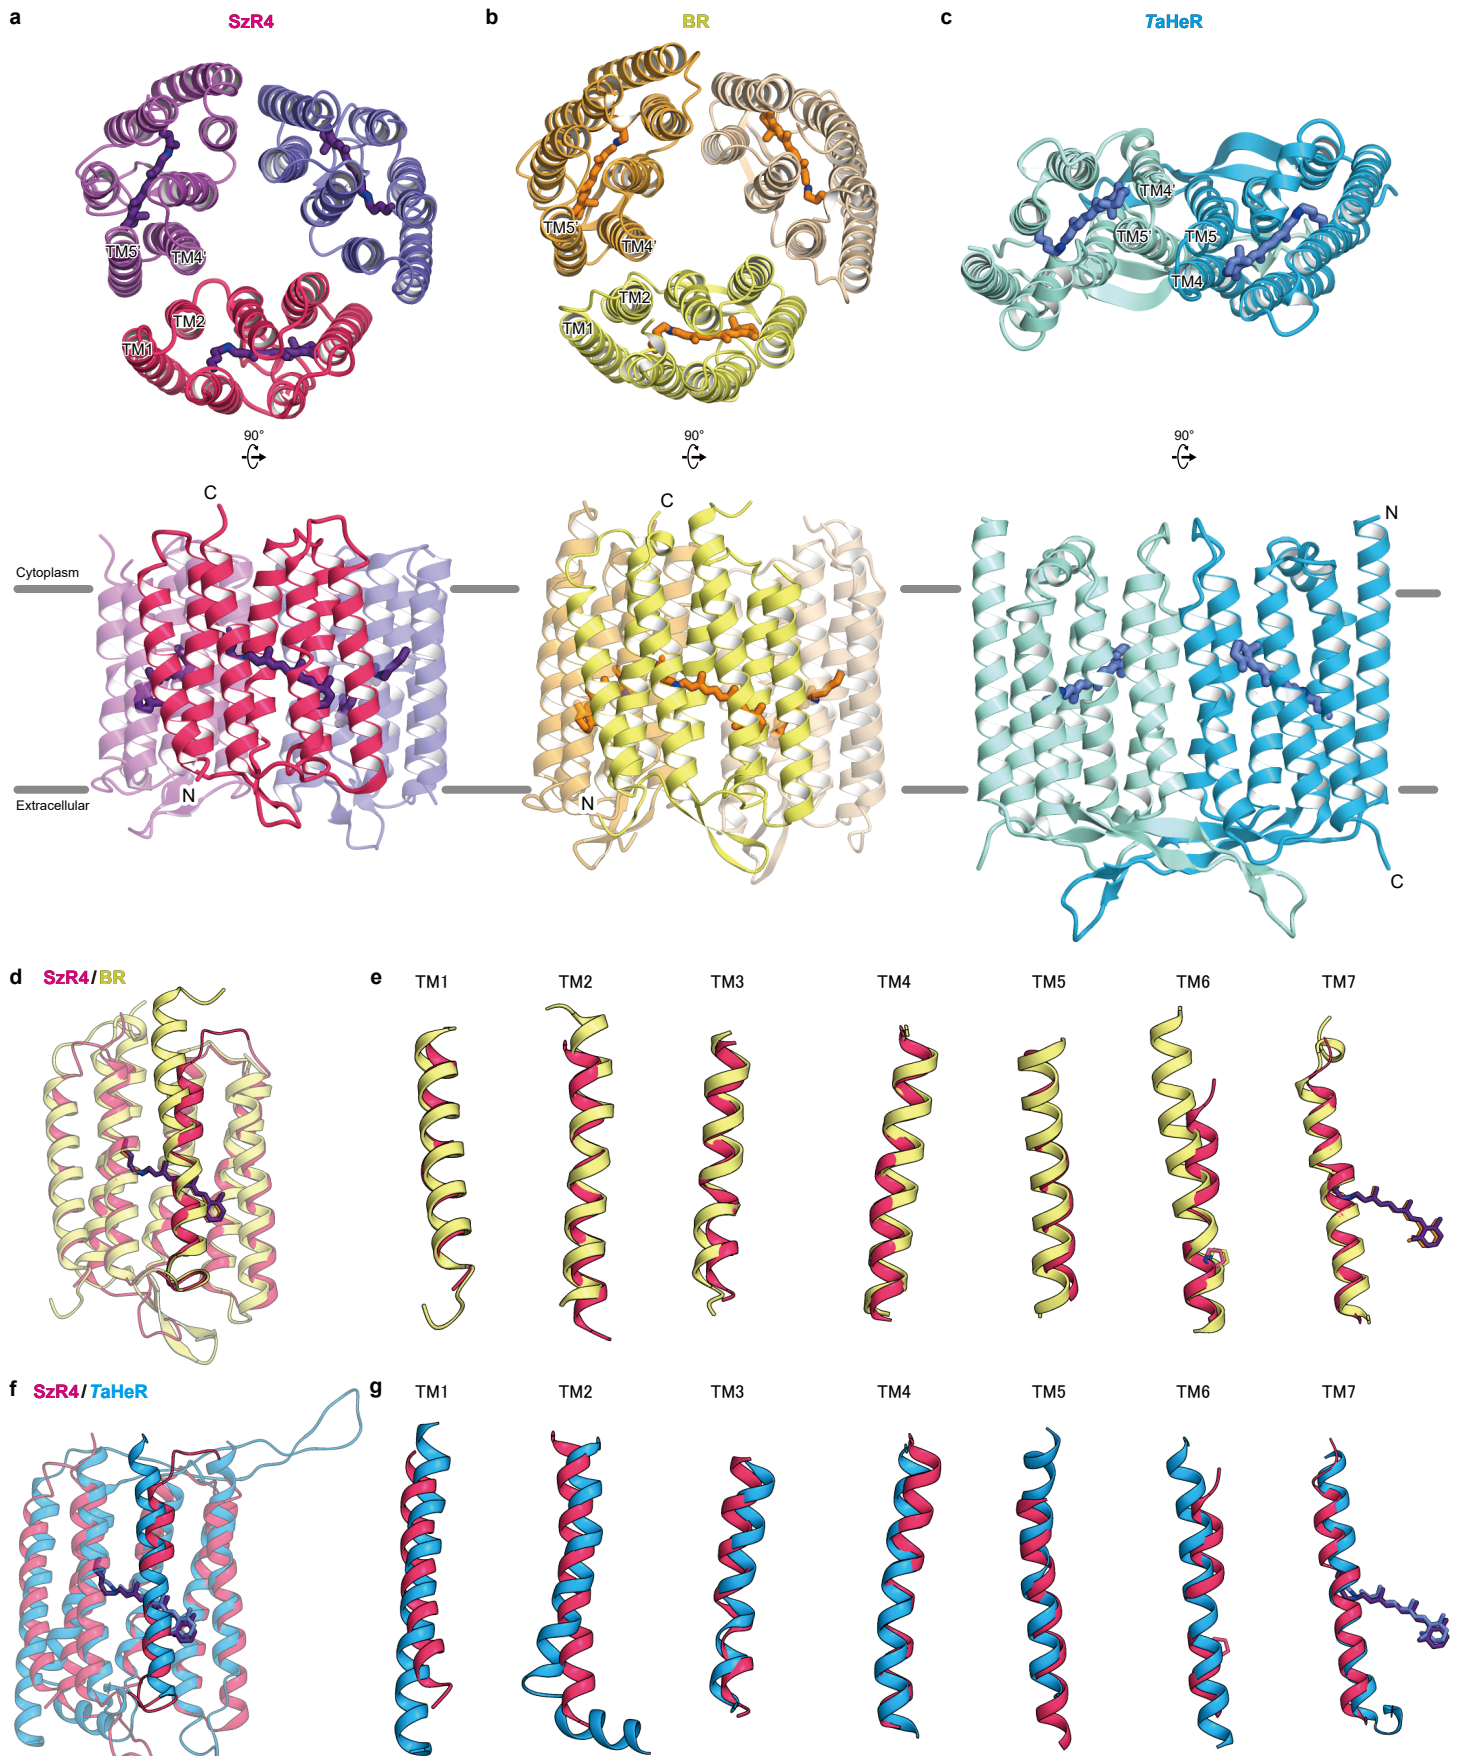

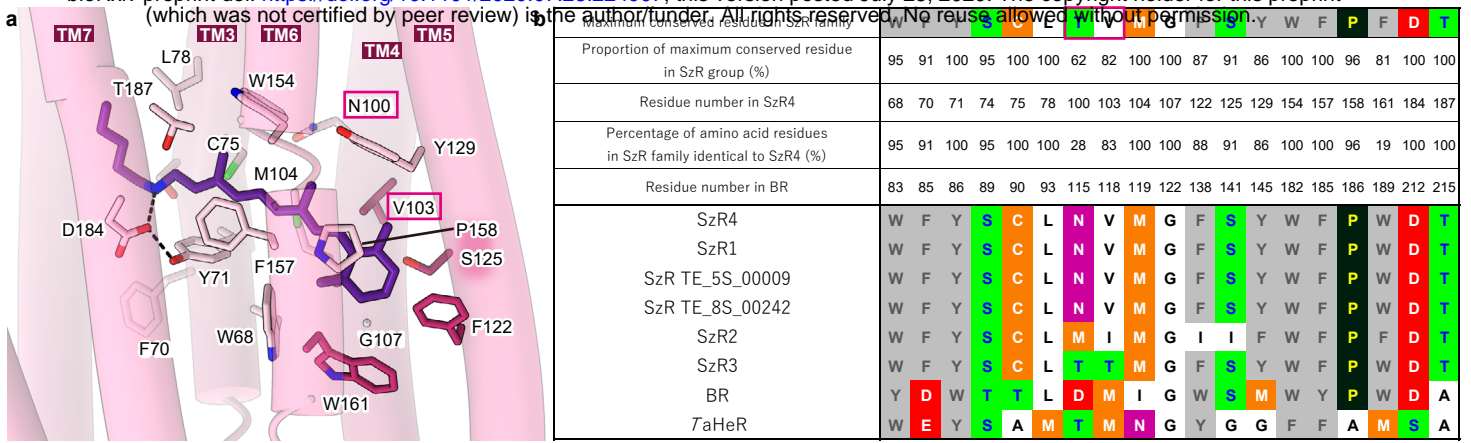

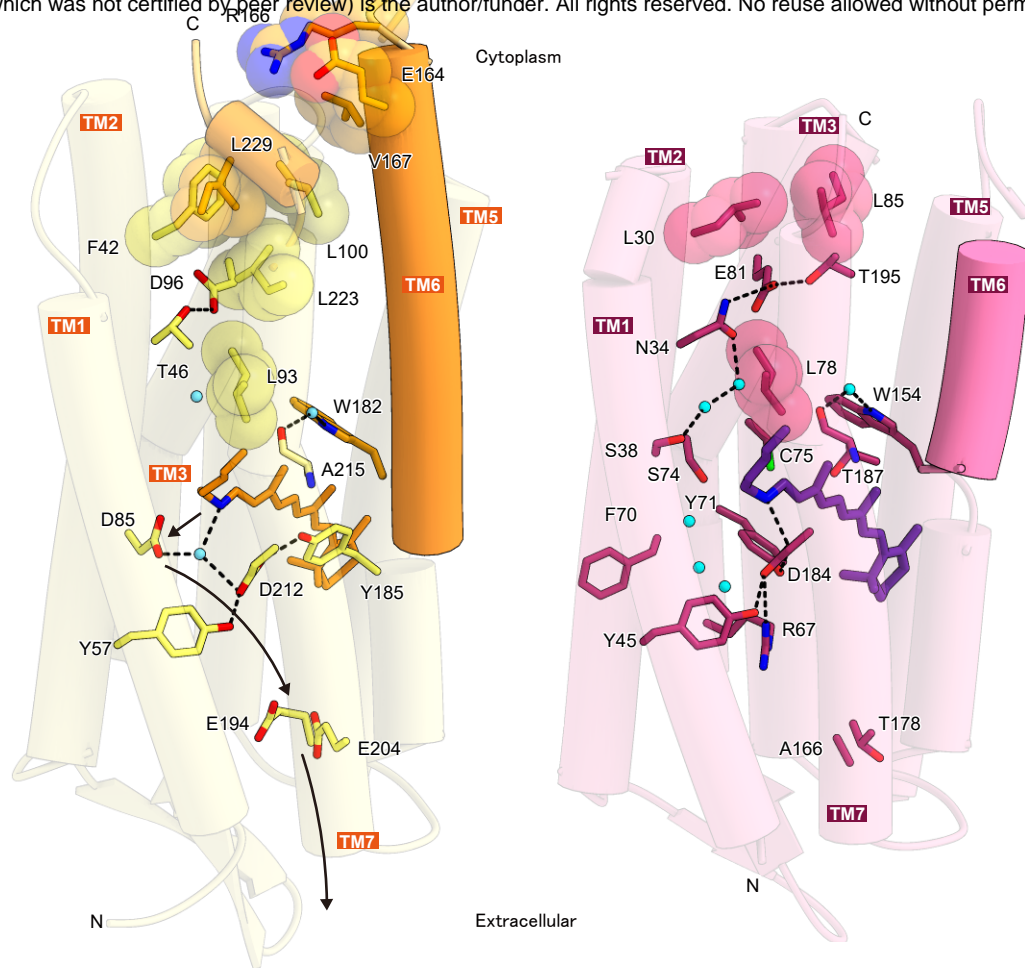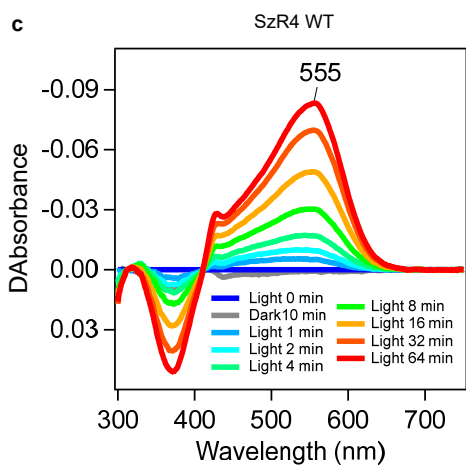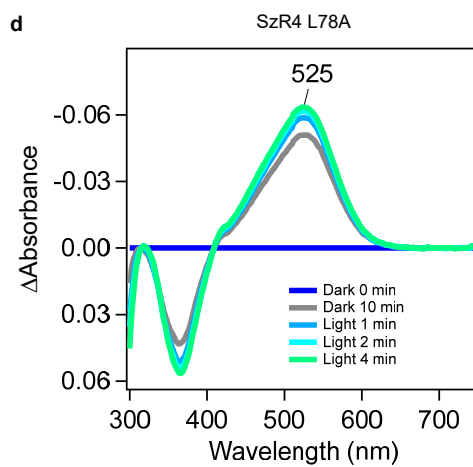



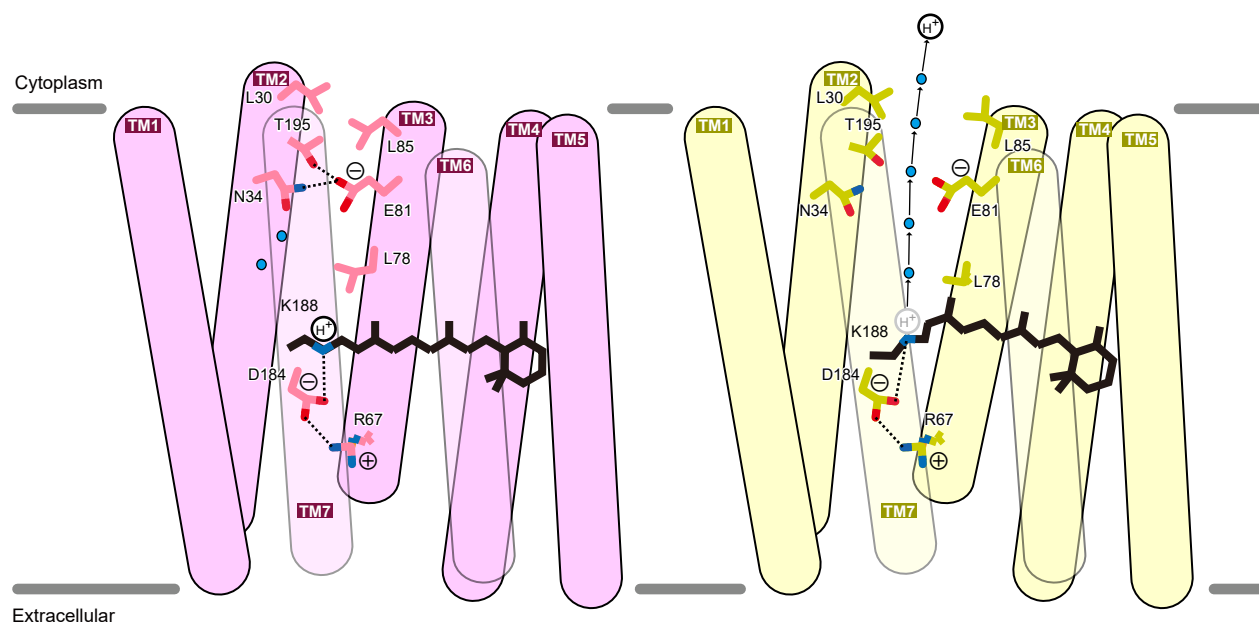

Higuchi et al., Figure 6

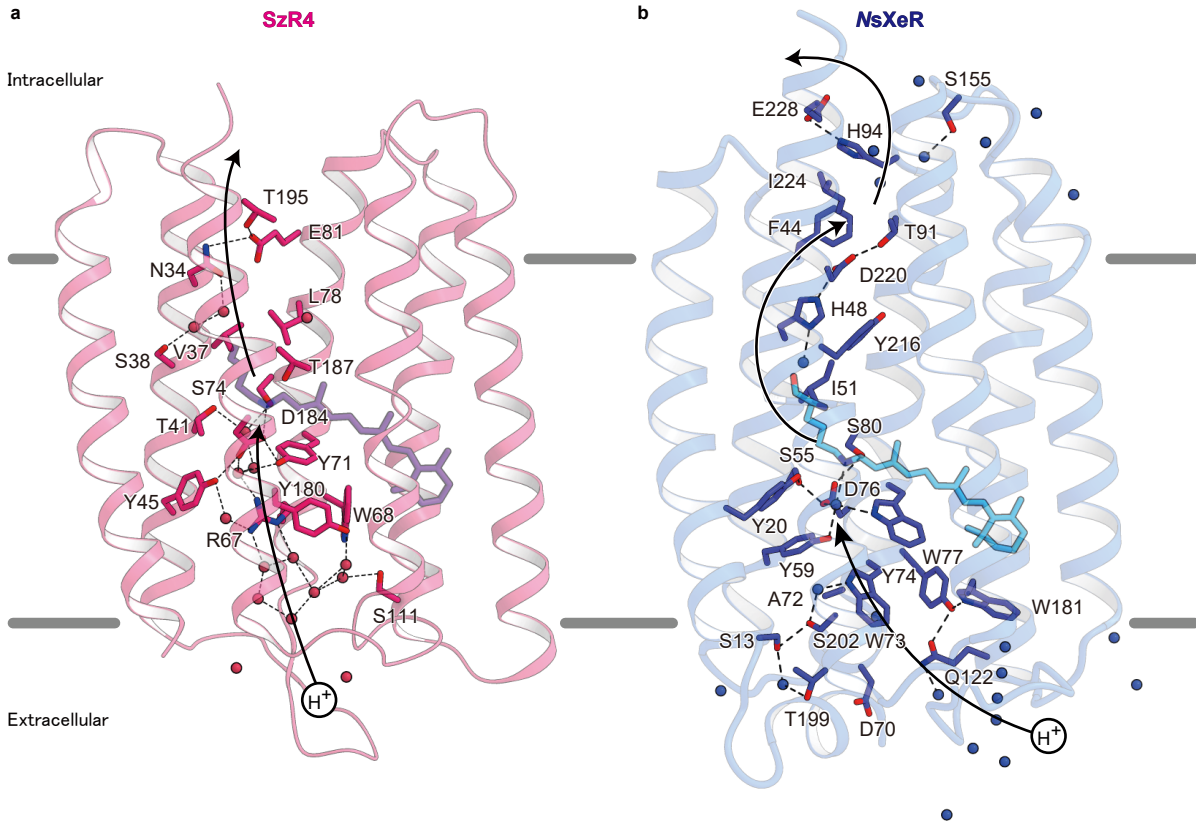

SZR4

---

**Data collection**

|                                    |                             |
|------------------------------------|-----------------------------|
| Space group                        | <i>C2</i>                   |
| Cell dimensions                    |                             |
| <i>a</i> , <i>b</i> , <i>c</i> (Å) | 106, 61.1, 98.8             |
| $\alpha$ , $\beta$ , $\gamma$ (°)  | 90, 99.353, 90              |
| Resolution (Å)*                    | 48.09 - 2.10 (2.175 - 2.10) |
| $R_{\text{meas}}$ *                | 0.3922 (3.369)              |
| $\langle I/\sigma(I) \rangle$ *    | 6.81 (1.18)                 |
| CC <sub>1/2</sub> *                | 0.988 (0.39)                |
| Completeness (%)*                  | 99.56 (98.45)               |
| Redundancy*                        | 19.3 (19.6)                 |

**Refinement**

|                                              |                 |
|----------------------------------------------|-----------------|
| Resolution (Å)                               | 49.56-2.10      |
| No. reflections                              | 36443           |
| $R_{\text{work}} / R_{\text{free}}$          | 0.1976 / 0.2376 |
| No. atoms                                    |                 |
| Protein                                      | 4858            |
| Ligand                                       | 780             |
| Water                                        | 144             |
| Averaged <i>B</i> -factors (Å <sup>2</sup> ) |                 |
| Protein                                      | 32.7            |
| Ligand                                       | 39.3            |
| Water                                        | 69.8            |
| R.m.s. deviations from ideal                 |                 |
| Bond lengths (Å)                             | 0.002           |
| Bond angles (°)                              | 0.527           |
| Ramachandran plot                            |                 |
| Favored (%)                                  | 98.6            |
| Allowed (%)                                  | 1.4             |
| Outlier (%)                                  | 0               |

---

\*Values in parentheses are for highest-resolution shell.

| SzR4 WT and mutants              |          |                       |                             |
|----------------------------------|----------|-----------------------|-----------------------------|
| Mutation type                    | Mutation | $\lambda_{\max}$ (nm) | $\Delta\lambda_{\max}$ (nm) |
| Mutation to SzR2-type amino acid | WT       | 555                   | 0                           |
|                                  | N100M    | 544                   | -11                         |
|                                  | V103I    | 551                   | -4                          |
|                                  | F122L    | 547                   | -8                          |
|                                  | S125Y    | n. d.                 | n. d.                       |
|                                  | W161F    | 553                   | -2                          |
| Mutation to SzR3-type amino acid | N100T    | 551                   | -4                          |
|                                  | V103T    | n. d.                 | n. d.                       |
| Mutation of P158 and T187        | P158T    | 553                   | -2                          |
|                                  | T187V    | n. d.                 | n. d.                       |
| n. d.: not determined            |          |                       |                             |
| SzR2 WT and mutants              |          |                       |                             |
| Mutation type                    | Mutation | $\lambda_{\max}$ (nm) | $\Delta\lambda_{\max}$ (nm) |
| Mutation to SzR4-type amino acid | WT       | 542                   | 0                           |
|                                  | M101N    | 543                   | 1                           |
|                                  | I104V    | 545                   | 3                           |
|                                  | L121F    | 541                   | -1                          |
|                                  | Y124S    | 536                   | -6                          |
|                                  | F164W    | 543                   | 1                           |
| SzR3 WT and mutants              |          |                       |                             |
| Mutation type                    | Mutation | $\lambda_{\max}$ (nm) | $\Delta\lambda_{\max}$ (nm) |
| Mutation to SzR4-type amino acid | WT       | 540                   | 0                           |
|                                  | T103N    | 543                   | 3                           |
|                                  | T106V    | 538                   | -2                          |
